# Supplementary material for: A redox-responsive hyaluronic acid-based hydrogel for chronic wound management
Source: Royal Society of Chemistry journal article supplement (doi:10.1039/c9tb01683j), 2019-01-01
Supplement: c9tb01683j1.pdf [file c9tb01683j1.pdf]

**Supplementary Information:** A Redox-Responsive Hyaluronic Acid-Based Hydrogel for Chronic Wound Management

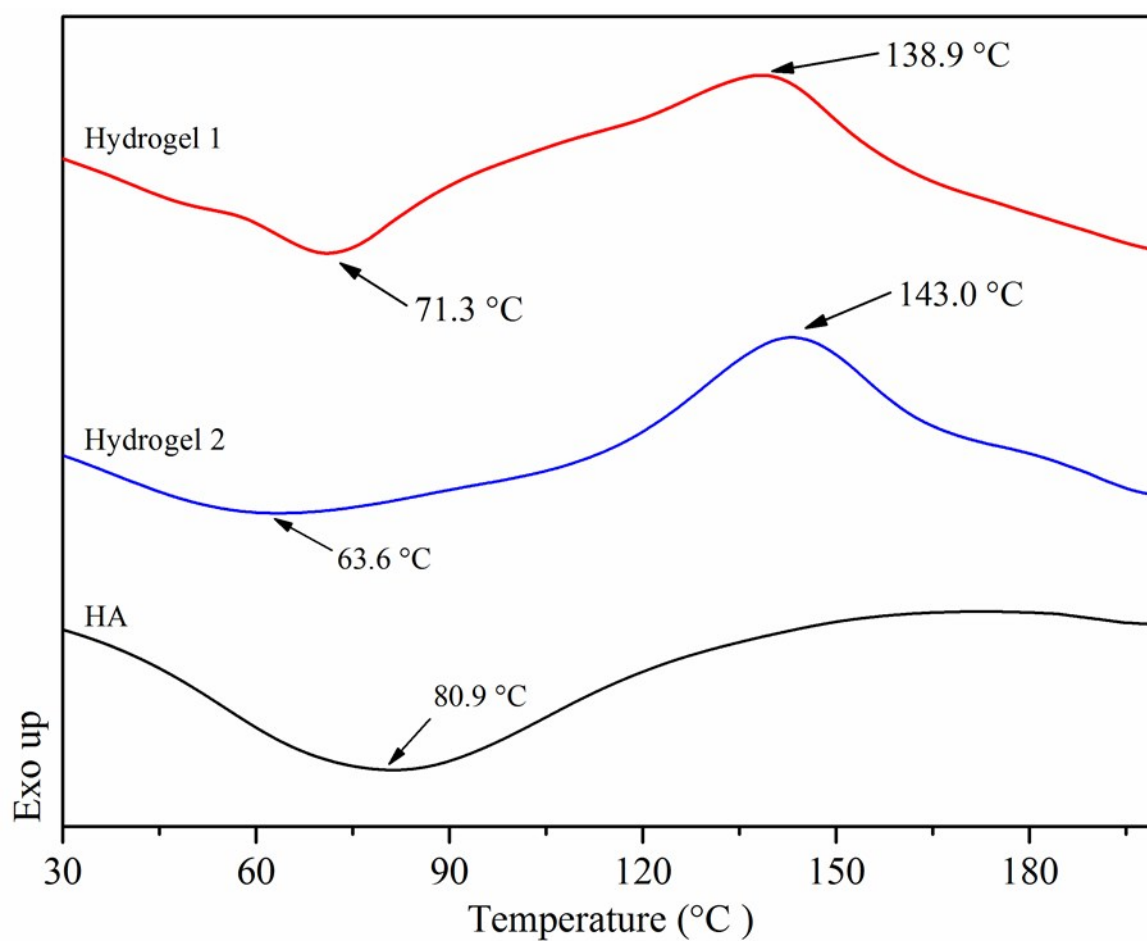

**Figure S1.** DSC thermograms corresponding to the crosslinked polymer used to form hydrogel **1** (top) and hydrogel **2** (middle), and linear HA.

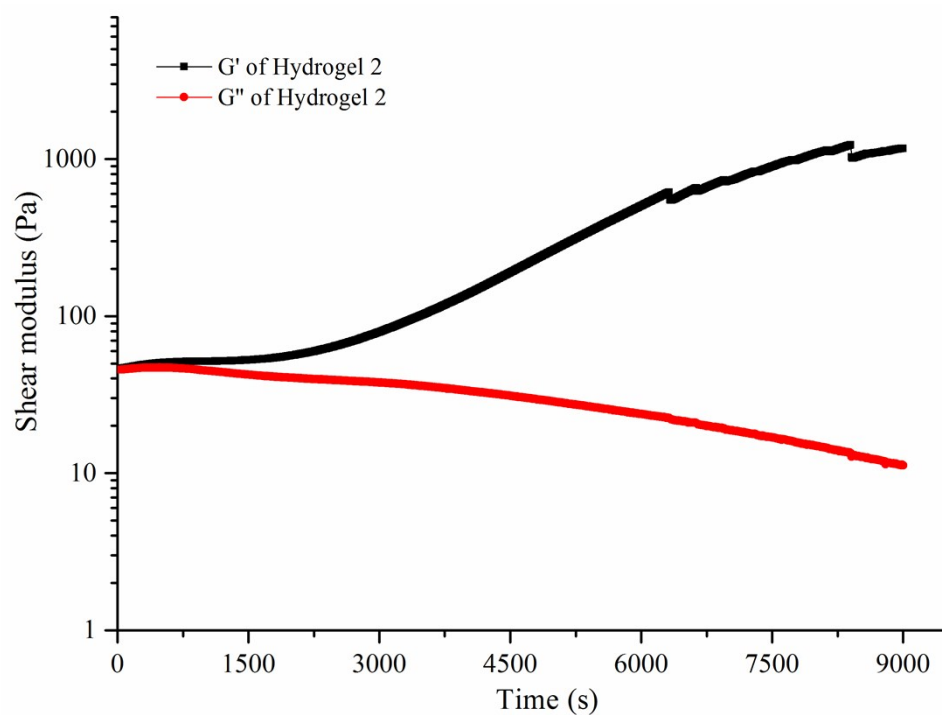

**Figure S2.** Time sweep rheological analysis during HA crosslinking to assess the gelation kinetics for hydrogel 2.

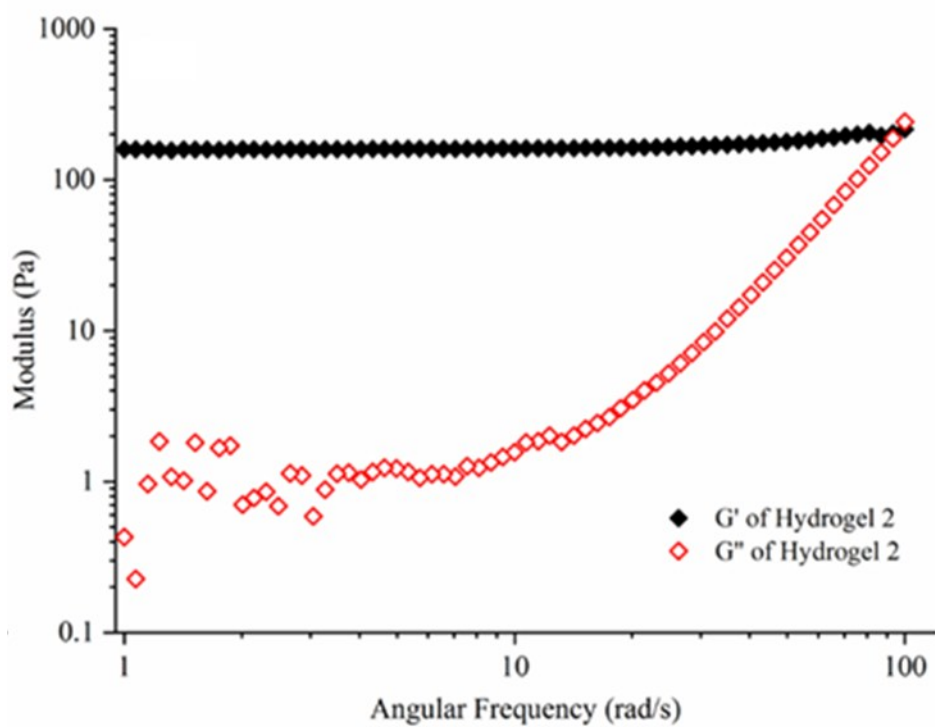

**Fig. S3.** Frequency sweep rheological analysis of the storage ( $G'$ ) and loss ( $G''$ ) modulus in hydrogel 2.

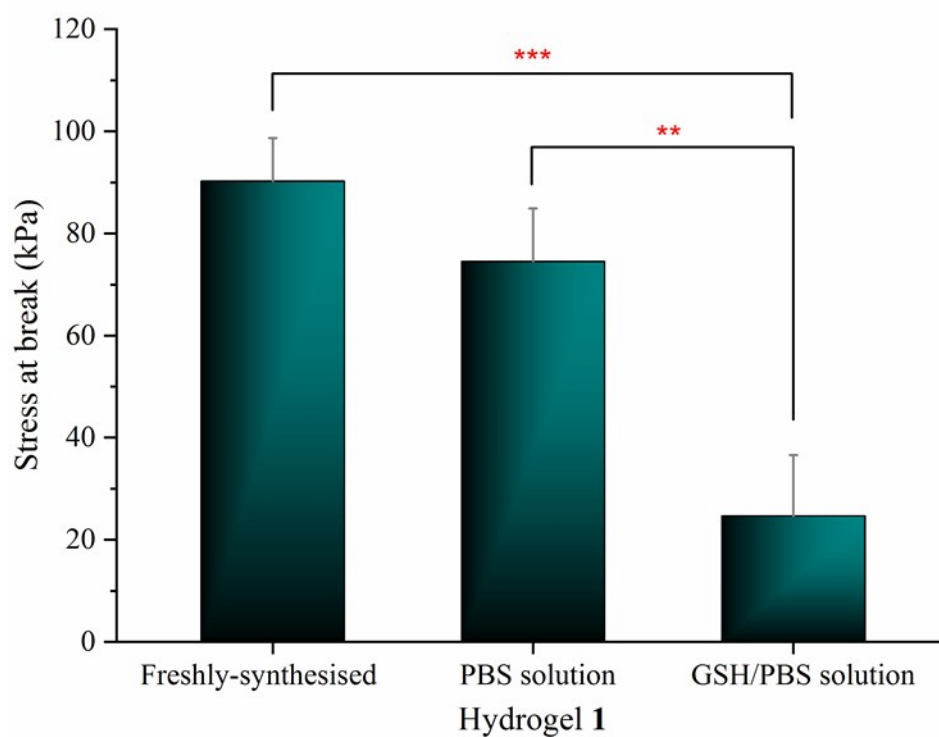

**Figure S4.** Stress at break measured for hydrogel **1** following synthesis and 48-hour incubation in either PBS or GSH (5 mM)-supplemented PBS buffer solution.

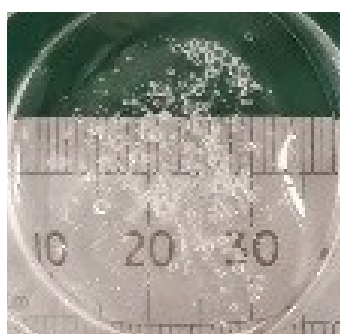

**Figure S5.** Dissolution of hydrogel **1** after 24-hour immersion in the simulated wound fluid containing 20 mM GSH. The material was too fragile to undergo any form of analysis.

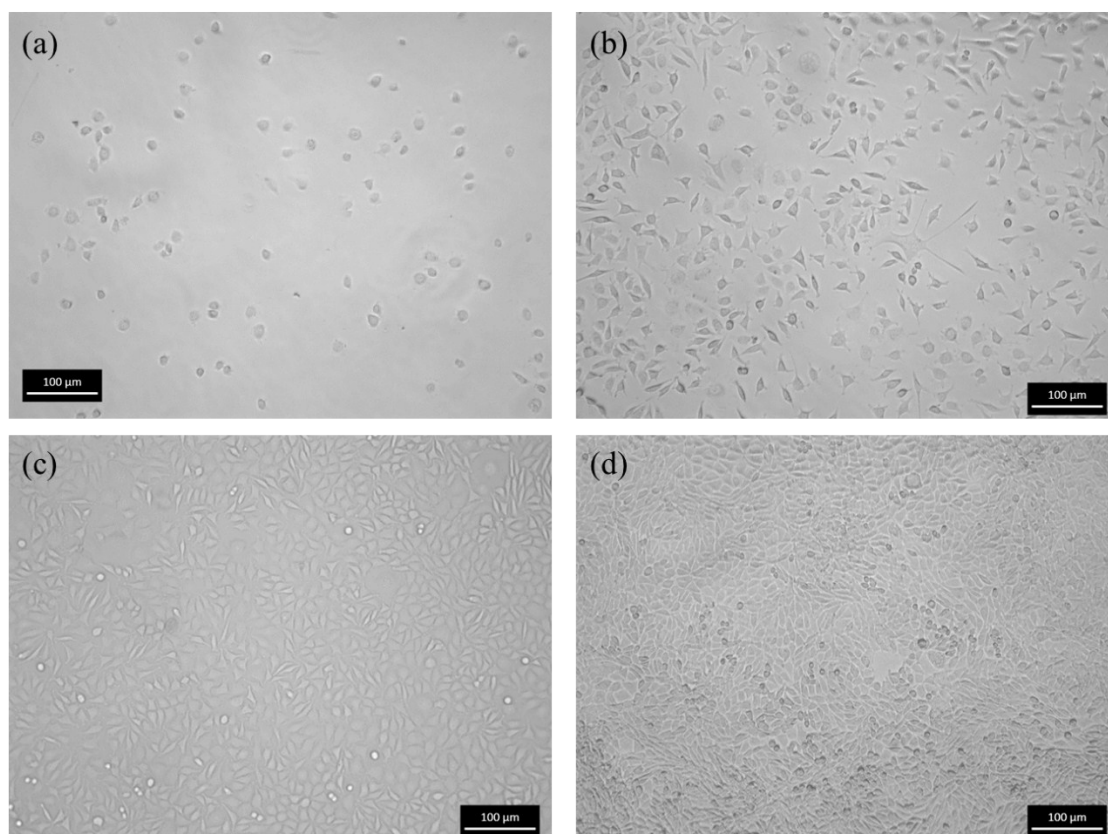

**Figure S6.** Optical microscopy images of L929 fibroblast cells cultured on TCP for 1 day (a), 3 days (b), 5 days (c) and 7 days (d).

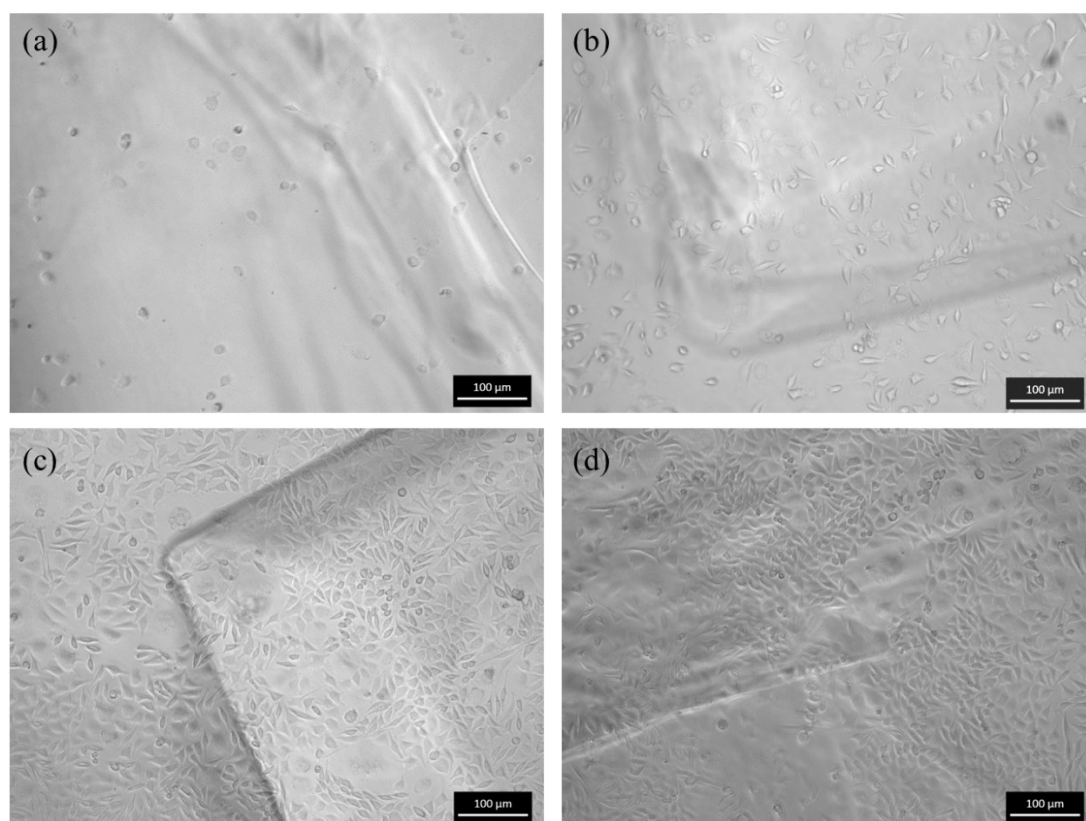

**Figure S7.** Optical microscopy images of L929 fibroblast cells cultured with hydrogel **1** for 1 day (a), 3 days (b), 5 days (c) and 7 days (d).

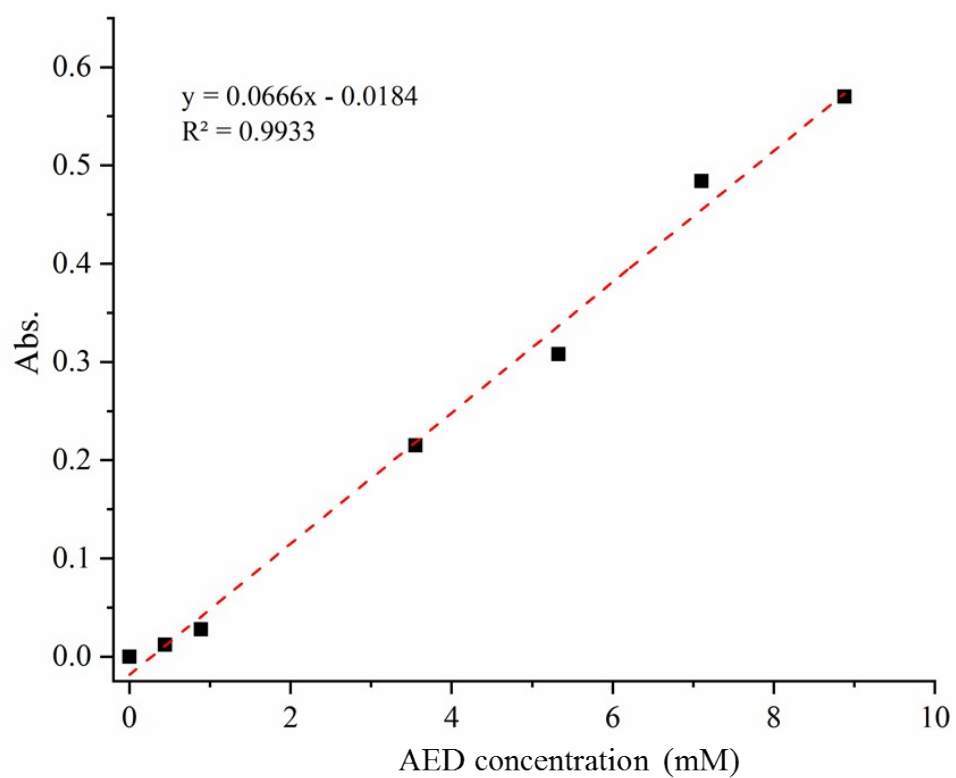

**Figure S8.** The calibration curve obtained for TNBS analysis.

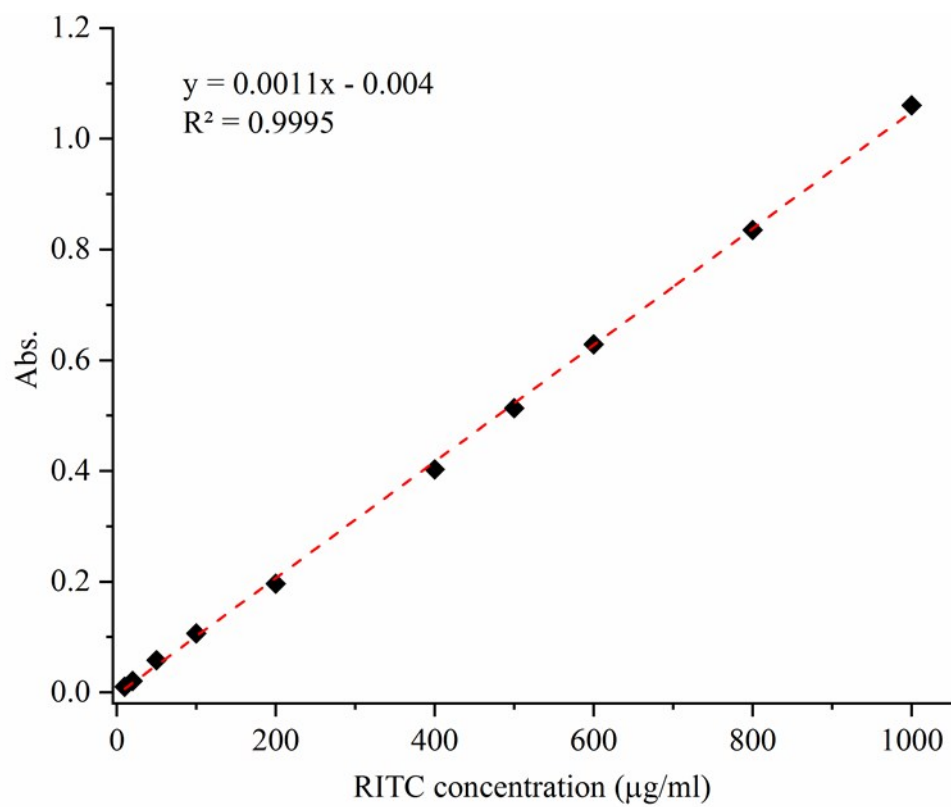

**Figure S9.** The calibration curve obtained for RITC analysis.

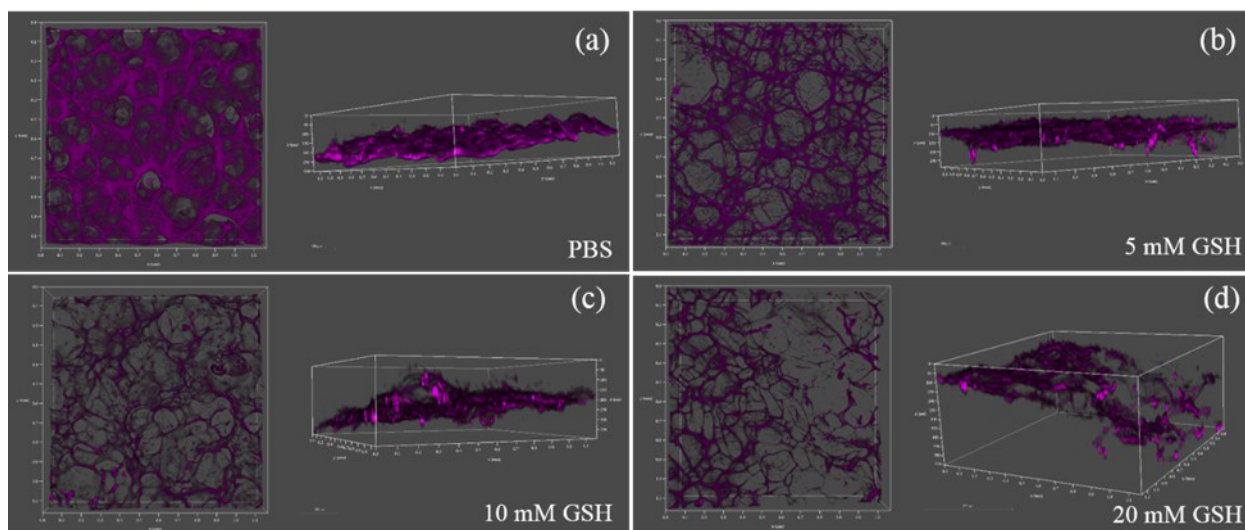

**Fig. S10.** Confocal images hydrogel **1** loaded with RITC-dextran in (a) PBS solution, and PBS solution supplemented with (b) 5 mM GSH, (c) 10 mM GSH, and (d) 20 mM GSH. The stained polymer network is provided in the left-hand image of each box, and becomes increasingly disintegrated with increased GSH concentration. The depth to which RITC-dextran was able to penetrate the hydrogel was related fluorescence depth profile for each hydrogel is provided in the right-hand image of each box.
